# Supplementary material
Source: publisher figshare collection journal article supplement (https://karger.figshare.com/articles/dataset/_/5123308)
Supplement: Supplementary file 1 [file 1 › 000336517_sm_Figures.pdf]

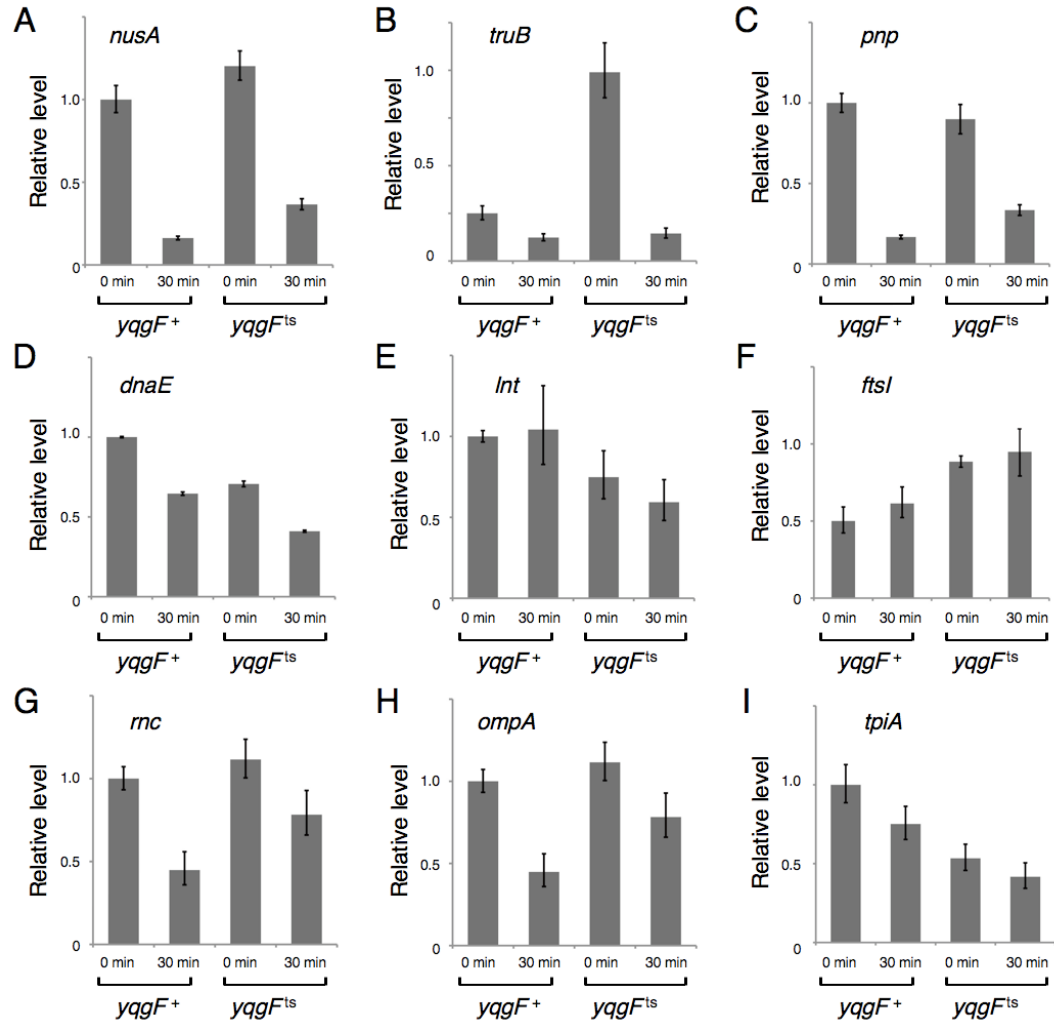

**Fig. S1. Quantitative real-time PCR analysis.** Levels of the *nusA*, *truB*, *pnp*, *dnaE*, *lnt*, *ftsI*, *rnc*, *ompA*, and *tpiA* transcripts were measured in the *yqgF*<sup>ts</sup> mutant and isogenic *yqgF*<sup>+</sup> strains at 0 and 30 min after the temperature shift from 30°C to 42°C. Relative amounts are shown. Each assay was repeated three times.

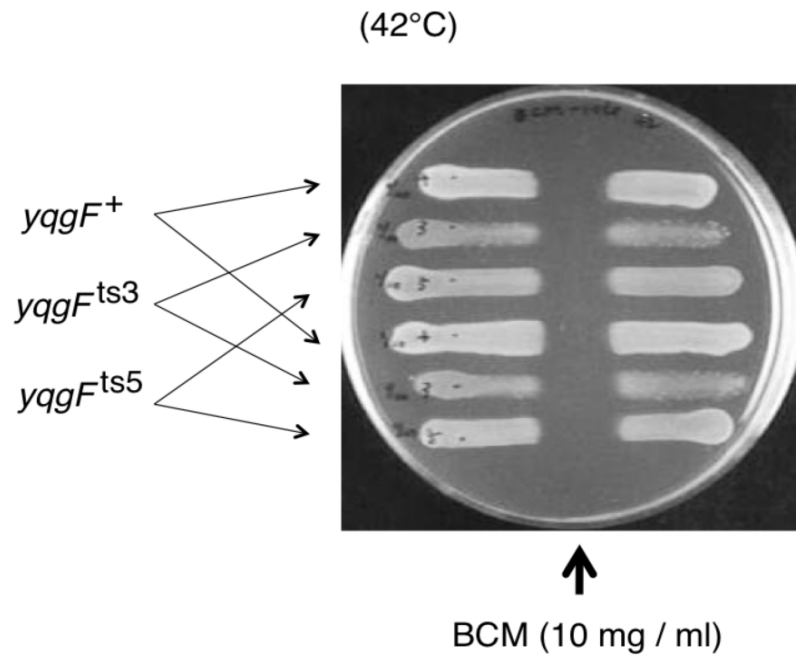

**Fig. S2. Growth of the *yqgF* mutant in the presence of bicyclomycin.** Bicyclomycin solution (10 mg/ml) was streaked onto the Antibiotic Medium 3 plate. Stationary phase cultures of the *yqgF*<sup>+</sup> and two *yqgF*<sup>ts</sup> mutants were diluted, streaked across the bicyclomycin, and incubated at 42°C.
