# Supplementary material
Source: publisher figshare collection journal article supplement (https://karger.figshare.com/articles/dataset/_/5123308)
Supplement: Supplementary file 1 [file 1 › 000336517_sm_Tables.pdf]

Table S1 Primer sequences

| Primer name | Sequence                                                            |
|-------------|---------------------------------------------------------------------|
| 127-41      | 5'-GCTCGCGGGCTTGCTAT-3'                                             |
| 127-42      | 5'-TCGGTTTAAAAGCTGGTCATCA-3'                                        |
| 141-25      | 5'-TTcAAccAccgcAcgATAgAg-3'                                         |
| 141-77-2    | 5'-gcgTAcccTgTTcAccggTAgcAAgAAcg-3'                                 |
| 141-62      | 5'-CATTTTCCGTGACGTCTCGTT-3'                                         |
| 141-63      | 5'-GCAACATGGAATCGCTGATT-3'                                          |
| 170-23      | 5'-AAGGTGCGCCGTACAGCTA-3'                                           |
| 170-24      | 5'-CGGCACCAGATGGTTTTGT-3'                                           |
| 178-21      | 5'-ATCCTCACCGATCTGCAAAAAG-3'                                        |
| 178-22      | 5'-GCGCAGCAGGGCAATG-3'                                              |
| 178-23      | 5'-AACGCTACTGCTGCCAAA-3'                                            |
| 178-24      | 5'-GGGCGTCGGTCAAATCG-3'                                             |
| 178-25      | 5'-GGCAGCCGATTATGAAAATCA-3'                                         |
| 178-26      | 5'-GACAATGGGCGCATCGA-3'                                             |
| 198-12      | 5'-ATGGGTCGGGCCATTGT-3'                                             |
| 198-13      | 5'-GGGCTGGTCCCAGTACCAT-3'                                           |
| 224-7       | 5'-CCCGCCACAAGGTCATAAGA-3'                                          |
| 224-8       | 5'-AAGGAAGAACGAGAAGCCATGT-3'                                        |
| 225-10      | 5'-ggAgATcTTcTTTcAAcAgcgTTTcgcg-3'                                  |
| 225-24      | 5'-ccAAgcTT TTATTTTTTccTTcAAcccATTtgccATc-3'                        |
| 225-34      | 5'-GTGCCCTTAAACGCCTGGTACTCGCCTGAATAAGTGAAATAACCTTTAATTCTGTCAGG-3'   |
| 225-35      | 5'-AGATATCGTGAGCATCAACACGCAC-3'                                     |
| 225-40      | 5'-CGAAGAGTTGAACGAAACGCATCAG-3'                                     |
| 225-41      | 5'-TTGGCCAGGGGCTTCCCGGTATCAACAGGGACACCAG AGCTTTACCCATATTACCTTAC-3'  |
| 273-14      | 5'- AAGCAACTGGTCTGTTCCTGACT-3'                                      |
| 273-15      | 5' - TTGCAACCAGCGGTGAT-3'                                           |
| 343-15      | 5'- GGTcAGCGGCCTGAGTGA-3'                                           |
| 343-16      | 5' - AGCCTTACGACGGCTTGAAC-3'                                        |
| 377-10      | 5'-AgATgggcgATcTgTATcTgATcAATggTg-3'                                |
| 377-24      | 5'-ccgAATcTcTAcAAccTgAcAcTcTcTcg-3'                                 |
| 377-27      | 5'-gAAggATcTcgTTgAgAcTc-3'                                          |
| 377-29      | 5'-TTggTgcccTTAAAcgccTggTgcTAacgccTgAATAAgTgggcgATTTAAAcgccTggcg-3' |
| 377-30      | 5'-TccTcTcTgAgATgAgTTTTgTTcgccgccATATcccTgcTcgAAATAgcTTTcg-3'       |
| 377-37-2    | 5'-ccgTcgATcTAcAAccTgAcAcTcTcTcg-3'                                 |
| 377-38      | 5'-ttggtcggatatcatcggc-3'                                           |
| 378-11      | 5'-AgcTggATTTTgcccTgTcg-3'                                          |
| 378-8       | 5'-TTgcgccgccTcAcAAAAGcTggAAgTgg-3'                                 |
| 387-16      | 5'-GCGGGCTACCAGCAGGTA-3'                                            |
| 387-17      | 5'-CGTTTGCGGATGCAGAAAC-3'                                           |
| 397-42      | 5'-ccggATcc AcAgAgATgATTAcTgcgccAgTTg-3'                            |
| 397-43      | 5'-ccggATcc gcTAcAgTTTATTAcgcTTcgTcAccg-3'                          |
| 447-50      | 5'-ccgAgcTccTggTAaccATTATTcAgcAg-3'                                 |
| 447-96      | 5'-acttaactcgtgcaaggcg-3'                                           |
| 448-13      | 5'-TTgggcccggcAAcAgTTTAccggcATc-3'                                  |
| 448-17      | 5'-gAgccAATTTcTAccgcAcg-3'                                          |
| 448-23      | 5'-CACCCGCGAAACCTACAAA-3'                                           |
| 448-24      | 5'-GCATCTTTCTTGGCGGACAT-3'                                          |
| 454-30      | 5'-ccAgATcT gTcAgTTgAAAgAgTTccTcgAcgc-3'                            |
| 454-31      | 5'-ccAgATcT ggAATTTTccTAAcATcgccAgcg-3'                             |
| 454-32      | 5'-GCGGCAGCCTGACCATT-3'                                             |
| 454-33      | 5'-GTCCATTTTAGAACCGGTATCGA-3'                                       |
| 454-31      | 5'-ccAgATcT ggAATTTTccTAAcATcgccAgcg-3'                             |
| 454-37      | 5'-cgccAccATATccATTAgcggAATg-3'                                     |
| 454-56      | 5'-ATGGGTCGGGATCTGTACGACGATGACGATAAG ATGAATCTTACCGAATTAAAGAATACG-3' |
| 466-22      | 5'- TCAGTACGGCGGCTCTGTAA -3'                                        |
| 466-23      | 5' - CCGGCTGAGCAAACAGTTCT -3'                                       |
| 466-46      | 5'- GTTCGCGTCACGGAAGGT -3'                                          |

|               |                                                                     |
|---------------|---------------------------------------------------------------------|
| 466-47        | 5'- TCGTCAATTCGCCCATACC -3'                                         |
| 466-48        | 5'- GACGAAAACGAACTGGGTGAA -3'                                       |
| 466-49        | 5'- CGCGGCTACGAACAACGT -3'                                          |
| 466-50        | 5'- GACGAAAACGAACTGGGTGAA -3'                                       |
| 466-51        | 5'- CGCGGCTACGAACAACGT -3'                                          |
| Cm N          | 5'-cTggTgTcccTgTTgATAcc-3'                                          |
| Cm C          | 5'-cAcTTATcTAgcgTAgcAc-3'                                           |
| CmC-BNH       | 5'-ccggATccggcgccgcAAgcTTcAcTTATcTAgcgTAgcAc-3'                     |
| L39-2B-CmC    | 5'-cTgATgcgAcgcTAAcgcgTcTTATcAgAccTATAgccgcAcTTATcTAgcgTAgcAc-3'    |
| L39-8A-CmN    | 5'-ATATcTcAccATgccTggTgTggcAggAcAcgccTgATgcTggTgTcccTgTTgATAcc-3'   |
| Myc-N         | 5'-ggcgccggcgAAcAAAAAcT-3'                                          |
| pBAD-ApU2Not  | 5'-TTTgcgccgcccgggAgcggATTTgAAcgTTgcg-3'                            |
| pBAD-ApURNot  | 5'-TTTgcgccgcccggATTTgTccTAcTAggAgAgcg-3'                           |
| pBAD-C2       | 5'-CCCGATTGTCTCTCTTAATTGGTAC-3'                                     |
| pBAD-EK       | 5'-cTTATcgTcATcgTcgTAcAg-3'                                         |
| pBAD-N4       | 5'-gATcgATggggATccgAgc-3'                                           |
| pBAD-N5       | 5'-cccTcgAgATcTgcAgcTggTAccATATggg-3'                               |
| Sa-ApL-R      | 5'-TgAAAgAAggTgTTgAAATggc-3'                                        |
| Sa-ApR        | 5'-ATAAATcTcgAAAAATAATAgAggg-3'                                     |
| tnaC(mut)-A   | 5'-caaaattgtcgatcacagaccttgattgccctctgtagccatcaccagagccaaaccg-3'    |
| tnaC(mut)-AR  | 5'-cggtttggtctggtgatggctacagaagggcaaatcaaggctgtgatcgacaatttg-3'     |
| tnaC(mut)-D   | 5'-caaaattgtcgatcacagatagtgatttgccctctgtagccatcaccagagccaaaccg-3'   |
| tnaC(mut)-DR  | 5'-cggtttggtctggtgatggctacagaagggcaaatcactatctgtgatcgacaatttg-3'    |
| tnaC(mut)-E   | 5'-caaaattgtcgatcactgattgccctctgtagccatcaccagagccaaaccg-3'          |
| tnaC(mut)-ER  | 5'-cggtttggtctggtgatggctacagaagggcaaatcagtgatcgacaatttg-3'          |
| tnaC(mut)-F   | 5'-caaaattgtcgatcacctggcttgattgccctctgtagccatcaccagagccaaaccg-3'    |
| tnaC(mut)-FR  | 5'-cggtttggtctggtgatggctacagaagggcaaatcaaggcaggtgatcgacaatttg-3'    |
| tnaC(mut)-G   | 5'-taaccatgaatatcttacatatatgtgtgacctcaaatccgtcaatattgacaacaaaa-3'   |
| tnaC(mut)-GR  | 5'-ttttgttcaatattgacggattttgaggtcacacatatatgaagattatcatggta-3'      |
| tnaC(mut)-H   | 5'-caaaattgtcgatcacccgcttgatgagccaaaccgattagattcaatgtgatc-3'        |
| tnaC(mut)-HR  | 5'-gatcacattgaatctaactcggtttggctcatcaaggcggtgatcgacaatttg-3'        |
| yqgF-A103I-F  | 5'-ctccatgacgagcgtcttagcactgtgaaatccgttccggtctgtttgaacagggcgcc-3'   |
| yqgF-A103I-R  | 5'-gccgccctgttcaaacagaccggaacggatttccacagtgctaagacgctgcatggag-3'    |
| yqgF-D122A-F  | 5'-ctatcgggcgctcaacaaggcaaatgtgcctctgctctgcggttattattctgaaag-3'     |
| yqgF-D122A-R  | 5'-ctttcgagaataataaccgcagaggcgagggcaactttgctttgtgagcgcccgatag-3'    |
| yqgF-D125A-F2 | 5'-ctatcgggcgctcaacaaggcaaatgtgacttgcgcgctgcggttattattctgaaag-3'    |
| yqgF-D9A-F    | 5'-atgagtggaaaccttactgccttgccttcggcaccaaaagcattggcgtagcggtcggc-3'   |
| yqgF-D9A-R    | 5'-tggccgaccgctacgccaatgttttgggtcggaagcggaagcgagtaagggttccactg-3'   |
| yqgF-E96A-F   | 5'-cgtttcggtgttgaagtaaaagctcatgacgcgctcttagcactgtggaagcccggtcc-3'   |
| yqgF-E96A-R   | 5'-ggaacggggttccacagtgtgaagacgcgctcatggagcttacttcaacaccgaaacg-3'    |
| yqgF-S105I-F  | 5'-gacgagcgtcttagcactgtggaagcccgatcggtctgtttgaacagggcggtatcg-3'     |
| yqgF-S105I-R  | 5'-ccgatagccgcctgttcaaacagaccgatacgggcttccacagtgtgaagacgctcgtc-3'   |
| yqgF-S125A-R2 | 5'-ctttcgagaataataaccgcagcggcagagtgcaactttgctttgtgagcgcccgatag-3'   |
| yqgF-T100I-F  | 5'-gtaaagctcatgacgagcgtcttagcattgtggaagcccggtccggtctgtttgaacag-3'   |
| yqgF-T100I-R  | 5'-ctgttcaaacagaccggaacgggcttcacaatgctaagacgctcgtcatggagctttac-3'   |
| yqgF-L6H-F    | 5'-ATGAGTGGAAACCTTACACGCCTTCGACTTCGGCACCAAAAGCATTGGCGTAGCGGTGCGC-3' |
| yqgF-L6H-R    | 5'-GCCGACCGCTACGCCAATGCTTTTGGTGCCGAAGTCGAAGGCGGTGAAGTTCCACTCAT-3'   |
| yqgF-E46G-F   | 5'-GACGGTACGCCGACTGGAACATTATCGGGCTTTACTGAAAGAGTGGCAGCCGGACGAA-3'    |
| yqgF-E46G-R   | 5'-TTCGTCCGGCTGCCACTCTTTCAGTAAACGCCGATAATGTTCCAGTCCGGCGTACCCTC-3'   |
| yqgF-E109G-F  | 5'-CGTCTTAGCACTGTGGAAGCCCGTTCCGGTCTGTTTGGACAGGGCGGCTATCGGGCGCTC-3'  |
| yqgF-E109G-R  | 5'-GAGCGCCCGATAGCCGCCCTGTCCAAACAGACCGGAACGGGCTTCCACAGTGCTAAGACG-3'  |
| yqgF-N117D-F  | 5'-CAGGGCGGCTATCGGGCGCTCGACAAAGGCAAAAGTTGACTCTGCCTCTGCGGTATTATT-3'  |
| yqgF-N117D-R  | 5'-AATAATAACCGCAGAGGCAGAGTCAACTTTGCCTTTGTGAGCGCCCGATAGCCGCCCTG-3'   |
| HJ-1          | 5'-GAGCTGCGCAATTCTGGCGTTAGGAGATACCGATAAGCTTCGGCTTAA-3'              |
| HJ-2          | 5'-CTTAAGCCGAAGCTTATCGGTATCTTGCTTACGACGCTAGCAAGTGATC-3'             |
| HJ-3          | 5'-TGATCACTTGCTAGCGTCGTAAAGCAGCTCGTGCTGTCTAGAGACATCGA-3'            |
| HJ-4          | 5'-ATCGATGTCTCTAGACAGCAGAGCCCTAACGCCAGAATTGCGCAGCGT-3'              |
| HJ-5          | 5'-CTTAAGCCGAAGCTTATCGGTATCTCCTAACGCCAGAATTGCGCAGCGT-3'             |
| HJ-7          | 5'-CTTAAGCCGAAGCTTATCGGTATCT-3'                                     |
| HJ-8          | 5'-GCTCGTGCTGTCTAGAGACATCGAG-3'                                     |

Table S2 Specific Primers used for construction of mutant *yggF*

| Plasmids with mutant <i>yggF</i>              | 1st PCR (1) |                       | 1st PCR (2) |                       | 2nd PCR |          |
|-----------------------------------------------|-------------|-----------------------|-------------|-----------------------|---------|----------|
| mF-Ap3-KmNot- <i>yggF</i> (D9A)               | 377-10      | yggF-D9A-R            | Sa-Ap-R     | yggF-D9A-F            | 377-38  | Sa-ApL-R |
| mF-Ap3-KmNot- <i>yggF</i> (E96A)              | 377-10      | yggF-E96A-R           | Sa-Ap-R     | yggF-E96A-F           | 377-38  | Sa-ApL-R |
| mF-Ap3-KmNot- <i>yggF</i> (D122A)             | 377-10      | yggF-D122A-R          | Sa-Ap-R     | yggF-D122A-F          | 377-38  | Sa-ApL-R |
| mF-Ap3-KmNot- <i>yggF</i> (S125A)             | 377-10      | yggF-S125A-R2         | Sa-Ap-R     | yggF-D125A-F2         | 377-38  | Sa-ApL-R |
| mF-Ap3-KmNot- <i>yggF</i> (T100I)             | 377-10      | yggF-T100I-R          | Sa-Ap-R     | yggF-T100I-F          | 377-38  | Sa-ApL-R |
| mF-Ap3-KmNot- <i>yggF</i> (A103I)             | 377-10      | yggF-A103I-R          | Sa-Ap-R     | yggF-A103I-F          | 377-38  | Sa-ApL-R |
| mF-Ap3-KmNot- <i>yggF</i> (S105I)             | 377-10      | yggF-S105I-R          | Sa-Ap-R     | yggF-S105I-F          | 377-38  | Sa-ApL-R |
| mF-Ap3-KmNot- <i>yggF</i> (deletionE96-G119)  | 377-10      | yggF-deletion-R2      | Sa-Ap-R     | yggF-deletion-F2      | 377-38  | Sa-ApL-R |
| mF-Ap3-KmNot- <i>yggF</i> (deletionF108-A115) | 377-10      | R-yggF-del(F108-A115) | Sa-Ap-R     | F-yggF-del(F108-A115) | 377-38  | Sa-ApL-R |

Table S3 Specific Primers used for construction of mutant *tnaC*

| Plasmids with mutant <i>tnaC</i> | 1st PCR (1) |        | 1st PCR (2)  |        | 2nd PCR |        |
|----------------------------------|-------------|--------|--------------|--------|---------|--------|
| pHSG415- <i>tnaC</i> (A)         | tnaC(mut)-A | 448-17 | tnaC(mut)-AR | 447-96 | 447-50  | 448-13 |
| pHSG415- <i>tnaC</i> (D)         | tnaC(mut)-D | 448-17 | tnaC(mut)-DR | 447-96 | 447-50  | 448-13 |
| pHSG415- <i>tnaC</i> (E)         | tnaC(mut)-E | 448-17 | tnaC(mut)-ER | 447-96 | 447-50  | 448-13 |
| pHSG415- <i>tnaC</i> (F)         | tnaC(mut)-F | 448-17 | tnaC(mut)-FR | 447-96 | 447-50  | 448-13 |
| pHSG415- <i>tnaC</i> (G)         | tnaC(mut)-G | 448-17 | tnaC(mut)-GR | 447-96 | 447-50  | 448-13 |
| pHSG415- <i>tnaC</i> (H)         | tnaC(mut)-H | 448-17 | tnaC(mut)-HR | 447-96 | 447-50  | 448-13 |

Table S4 Specific Primers used for qRT-PCR

| Gene        | Primer (1) | Primer (2) |
|-------------|------------|------------|
| <i>cca</i>  | 387-16     | 387-17     |
| <i>dnaE</i> | 127-41     | 127-42     |
| <i>galE</i> | 178-21     | 178-22     |
| <i>galk</i> | 178-25     | 178-26     |
| <i>galT</i> | 178-23     | 178-24     |
| <i>gapA</i> | 273-14     | 273-15     |
| <i>lacZ</i> | 141-62     | 141-63     |
| <i>Int</i>  | 170-23     | 170-24     |
| <i>nusA</i> | 466-50     | 466-51     |
| <i>ompA</i> | 198-12     | 198-13     |
| <i>pnp</i>  | 466-48     | 466-49     |
| <i>rho</i>  | 454-32     | 454-33     |
| <i>rnc</i>  | 343-15     | 343-16     |
| <i>tnaA</i> | 448-23     | 448-24     |
| <i>tpiA</i> | 466-22     | 466-23     |
| <i>trpE</i> | 224-7      | 224-8      |
| <i>truB</i> | 466-46     | 466-47     |
